# Supplementary material for: Individual fate and gut microbiome composition in the European wild rabbit (Oryctolagus cuniculus)
Source: PubMed Central journal article supplement (PMC7804928; doi:10.1038/s41598-020-80782-4), 2021-01-12

# SUPPLEMENTARY INFORMATION

## (2 Tables and 2 Figures)

### Individual fate and gut microbiome composition in the European wild rabbit (*Oryctolagus cuniculus*)

Gerard Funosas, Xavier Triadó-Margarit, Francisca Castro, Rafael Villafuerte, Miguel Delibes-Mateos, Carlos Rouco, Emilio O. Casamayor\*

E-mail: casamayor@ceab.csic.es

**Table S1.** Ancillary data for captive rabbits from different plots and cages in the Wild Lagomorph Investigation Center (code R.E.G.A. 021CO00962): *subspecies* ('CUN': *O. c. cuniculus*, 'ALG': *O. c. algirus*), *sex* ('F': female, 'M': male), *weight* (g), *tarsus* (mm), *BMI* (Body Mass Index: weight/tarsus), *age* (years), *fate* ('unk': unknown, see main text). Biometric variables (weight, tarsus, body mass index) and fate only available for rabbits in plots.

| sample | Captive | subsp | sex | plot | warren | weight | tarsus | BMI   | age | fate  | sample | Captive | subsp | sex | cage | age |
|--------|---------|-------|-----|------|--------|--------|--------|-------|-----|-------|--------|---------|-------|-----|------|-----|
| M068   | PLOT    | CUN   | M   | 1    | 2      | 1164   | 58     | 20,07 | <1  | unk.  | D590   | CAGE    | ALG   | F   | 19   | <1  |
| M070   | PLOT    | CUN   | M   | 1    | 5      | 1125   | 60     | 18,75 | <1  | alive | D638   | CAGE    | ALG   | F   | 19   | >3  |
| M083   | PLOT    | CUN   | M   | 1    | NA     | 1218   | 60     | 20,30 | 2-3 | alive | D742   | CAGE    | ALG   | F   | 19   | 2-3 |
| M088   | PLOT    | CUN   | M   | 1    | 8      | 1055   | 62     | 17,02 | <1  | dead  | D783   | CAGE    | ALG   | F   | 19   | 2-3 |
| M089   | PLOT    | CUN   | M   | 6    | 4      | 1124   | 61     | 18,43 | <1  | dead  | M003   | CAGE    | ALG   | F   | 20   | <1  |
| M090   | PLOT    | CUN   | M   | 6    | 2      | 1284   | 61     | 21,05 | <1  | alive | M004   | CAGE    | ALG   | F   | 20   | <1  |
| M091   | PLOT    | CUN   | M   | 6    | 7      | 1125   | 58     | 19,40 | <1  | dead  | M007   | CAGE    | ALG   | F   | 20   | <1  |
| M094   | PLOT    | CUN   | F   | 6    | 1      | 1035   | 60     | 17,25 | <1  | alive | M131   | CAGE    | ALG   | M   | 15   | <1  |
| M095   | PLOT    | CUN   | F   | 6    | 1      | 1029   | 61     | 16,87 | <1  | alive | M132   | CAGE    | ALG   | F   | 11   | <1  |
| M097   | PLOT    | CUN   | F   | 6    | 9      | 1129   | 60     | 18,82 | <1  | dead  | M133   | CAGE    | ALG   | M   | 15   | <1  |
| M100   | PLOT    | CUN   | M   | 6    | 6      | 1257   | 61     | 20,61 | <1  | dead  | M151   | CAGE    | ALG   | M   | 15   | <1  |
| M113   | PLOT    | CUN   | F   | 6    | 5      | 1085   | 62     | 17,50 | <1  | alive | M152   | CAGE    | ALG   | F   | 11   | <1  |
| M116   | PLOT    | CUN   | M   | 6    | 9      | 1180   | 60     | 19,67 | <1  | alive | M200   | CAGE    | ALG   | F   | 11   | <1  |
| M122   | PLOT    | CUN   | F   | 6    | 2      | 1239   | 61     | 20,31 | 2-3 | alive | M202   | CAGE    | ALG   | M   | 12   | <1  |
| M150   | PLOT    | CUN   | M   | 1    | 9      | 1171   | 59     | 19,85 | 2-3 | dead  | M205   | CAGE    | ALG   | M   | 12   | <1  |
| M156   | PLOT    | ALG   | F   | 3    | 5      | 975    | 58     | 16,81 | <1  | unk.  | N361   | CAGE    | ALG   | F   | 4    | 1-2 |
| M158   | PLOT    | ALG   | M   | 3    | 8      | 994    | 53     | 18,75 | <1  | unk.  | N626   | CAGE    | ALG   | F   | 2    | 1-2 |
| M180   | PLOT    | ALG   | M   | 8    | 6      | 1060   | 55     | 19,27 | <1  | alive |        |         |       |     |      |     |
| M183   | PLOT    | ALG   | F   | 8    | 7      | 1210   | 54     | 22,41 | 1-2 | alive |        |         |       |     |      |     |
| M187   | PLOT    | CUN   | M   | 6    | 2      | 1194   | 60     | 19,90 | <1  | alive |        |         |       |     |      |     |
| M193   | PLOT    | CUN   | F   | 6    | 3      | 1055   | 62     | 17,02 | <1  | dead  |        |         |       |     |      |     |
| M195   | PLOT    | CUN   | F   | 6    | 5      | 1266   | 60     | 21,10 | <1  | unk.  |        |         |       |     |      |     |
| M196   | PLOT    | CUN   | F   | 6    | 5      | 1198   | 62     | 19,32 | <1  | alive |        |         |       |     |      |     |
| M212   | PLOT    | ALG   | M   | 3    | 10     | 977    | 50     | 19,54 | <1  | unk.  |        |         |       |     |      |     |
| M213   | PLOT    | ALG   | M   | 3    | 10     | 962    | 54     | 17,81 | <1  | dead  |        |         |       |     |      |     |
| M214   | PLOT    | ALG   | M   | 3    | 8      | 961    | 55     | 17,47 | <1  | unk.  |        |         |       |     |      |     |
| M216   | PLOT    | ALG   | M   | 3    | 6      | 998    | 55     | 18,15 | <1  | unk.  |        |         |       |     |      |     |
| M218   | PLOT    | ALG   | M   | 3    | 4      | 933    | 52     | 17,94 | <1  | dead  |        |         |       |     |      |     |
| M219   | PLOT    | ALG   | M   | 3    | 3      | 1085   | 55     | 19,73 | <1  | dead  |        |         |       |     |      |     |
| M221   | PLOT    | ALG   | M   | 8    | 3      | 950    | 54     | 17,59 | <1  | unk.  |        |         |       |     |      |     |
| M222   | PLOT    | CUN   | M   | 1    | 2      | 1040   | 60     | 17,33 | <1  | unk.  |        |         |       |     |      |     |
| M223   | PLOT    | CUN   | F   | 1    | 10     | 1080   | 57     | 18,95 | 1-2 | dead  |        |         |       |     |      |     |
| M225   | PLOT    | CUN   | F   | 1    | 7      | 1000   | 57     | 17,54 | <1  | alive |        |         |       |     |      |     |
| M227   | PLOT    | CUN   | M   | 1    | 8      | 1457   | 58     | 25,12 | <1  | unk.  |        |         |       |     |      |     |
| M229   | PLOT    | CUN   | M   | 6    | 2      | 1140   | 61     | 18,69 | <1  | alive |        |         |       |     |      |     |
| N621   | PLOT    | ALG   | M   | 8    | 7      | 958    | 53     | 18,08 | 1-2 | unk.  |        |         |       |     |      |     |
| Q104   | PLOT    | CUN   | F   | 6    | 8      | 1374   | 61     | 22,52 | 1-2 | alive |        |         |       |     |      |     |
| Q147   | PLOT    | CUN   | F   | 6    | 6      | 1199   | 59     | 20,32 | 1-2 | alive |        |         |       |     |      |     |
| Q205   | PLOT    | CUN   | F   | 1    | 8      | 1203   | 58     | 20,74 | 1-2 | alive |        |         |       |     |      |     |

**Table S2.** Published data for the relative abundance of *Ruminococcaceae* vs. *Enterobacteriaceae* in different animal gut microbiomes.

| Diet                                           | Animal                                                      | Status                | Samples origin (number) | % <i>Ruminococcaceae</i> vs. % <i>Enterobacteriaceae</i> | Reference              |
|------------------------------------------------|-------------------------------------------------------------|-----------------------|-------------------------|----------------------------------------------------------|------------------------|
| Herbivore                                      | New Zealand white rabbit ( <i>O. cuniculus</i> )            | Captive, healthy      | Faeces (20)             | 13.8% vs. ~0%                                            | Eshar & Weese, 2014    |
|                                                | Rex rabbit ( <i>O. cuniculus</i> )                          | Captive               | Faeces (20)             | ~15% vs. ~2%                                             | Zeng et al., 2015      |
|                                                | Cattle ( <i>Bos</i> spp.)                                   | Captive, healthy      | Faeces (30)             | ~35% vs. <1%                                             | Shanks et al., 2011    |
|                                                | White rhinoceros ( <i>Ceratotherium simum</i> )             | Semi-captive, healthy | Faeces (4)              | 19.5% vs. ~0%                                            | Bian et al., 2013      |
|                                                | Horse ( <i>Equus ferus caballus</i> )                       | Captive, healthy      | Faeces (6)              | 68.1% Firmicutes vs. 10% Proteobacteria                  | Costa et al., 2012     |
|                                                |                                                             | Captive, unhealthy    | Faeces (4)              | 30% Firmicutes vs. 18% Proteobacteria                    |                        |
|                                                | Chicken ( <i>Gallus gallus domesticus</i> )                 | Captive               | Caecum (40)             | ~13% vs. <3%                                             | Danzeisen et al., 2011 |
| Gopher tortoise ( <i>Gopherus polyphemus</i> ) | Wild                                                        | Faeces (46)           | ~38% Firmicutes vs. <3% | Yuan et al., 2015                                        |                        |
| Insectivore                                    | Waterhouse's leaf-nosed bat ( <i>Macrotus waterhousii</i> ) | Wild                  | Intestine (22)          | 0.56% vs. 20.8%                                          | Phillips et al., 2012  |
| Hematophagous                                  | Common vampire bat ( <i>Desmodus rotundus</i> )             | Wild                  | Intestine (3)           | 0.49% vs. 4.4%                                           |                        |

## References

- Bian, G., Ma, L., Su, Y., & Zhu, W. (2013). The microbial community in the feces of the white rhinoceros (*Ceratotherium simum*) as determined by barcoded pyrosequencing analysis. *PLoS One*, 8(7): e70103. doi: 10.1371/journal.pone.0070103
- Costa, M. C., Arroyo, L. G., Allen-Vercoe, E., Stämpfli, H. R., Kim, P. T., Sturgeon, A., & Weese, J. S. (2012). Comparison of the fecal microbiota of healthy horses and horses with colitis by high throughput sequencing of the V3-V5 region of the 16S rRNA gene. *PLoS One*, 7(7): e41484. doi: 10.1371/journal.pone.0041484
- Danzeisen, J.L., Kim, H.B., Isaacson, R.E., Tu, Z.J., & Johnson, T.J. (2011). Modulations of the chicken cecal microbiome and metagenome in response to anticoccidial and growth promoter treatment. *PLoS One*, 6(11): e27949. doi: 10.1371/journal.pone.0027949
- Eshar, D. & Weese, J. S. (2014). Molecular analysis of the microbiota in hard feces from healthy rabbits (*Oryctolagus cuniculus*) medicated with long term oral meloxicam. *BMC Veterinary Research*, 10, 62. doi: 10.1186/1746-6148-10-62
- Phillips, C. D., Phelan, G., Dowd, S. E., McDonough, M. M., Ferguson, A. W., Delton, H. J., ... & Baker, R. J. (2012). Microbiome analysis among bats describes influences of host phylogeny, life history, physiology and geography. *Molecular Ecology* 21, 2617–2627. doi: 10.1111/j.1365-294X.2012.05568.x
- Shanks, O.C., Kelty, C. A., Archibeque, S., Jenkins, M., Newton, R.J., McLellan, S. L., Huse, & S. M., Sogin, M. L. (2011). Community structures of fecal bacteria in cattle from different animal feeding operations. *Applied Environmental Microbiology*, 77, 2992-3001. doi: 10.1128/AEM.02988-10
- Yuan, M. L., Dean, S. H., Longo, A. V., Rothermel, B. B., Tuberville, T. D. & Zamudio, K. R. (2015). Kinship, inbreeding and fine-scale spatial structure influence gut microbiota in a hindgut-fermenting tortoise. *Molecular Ecology*, 24: 2521-2536. doi:10.1111/mec.13169
- Zeng, B., Han, S., Wang, P., Wen, B., Jian, W., Guo, ... & Li, Y. (2015). The bacterial communities associated with fecal types and body weight of rex rabbits. *Scientific Reports* 5(1), 9342. doi: 10.1038/srep09342

**Fig. S1.** Correlation between the relative abundance of *Ruminococcaeae* and *Enterobacteriaceae* and community Shannon index, respectively, for each sample. Spearman's Rank order coefficients strongly significant ( $P < 0.001$ ).

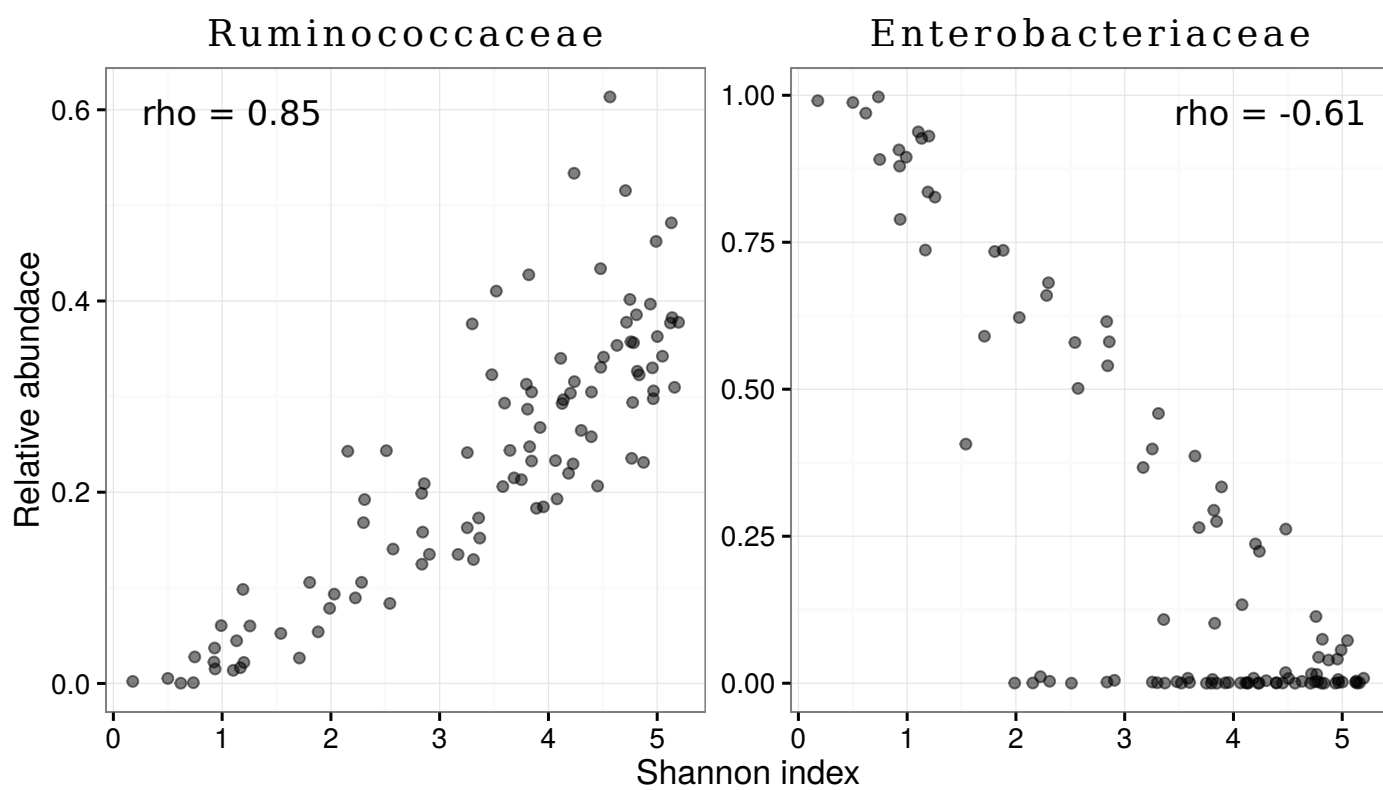

**Fig. S2.** Comparison of alpha-diversity parameters (richness, Shannon, phylogenetic diversity) between samples of different subspecies for wild and captive individuals. Values were obtained from the mean parameters after 100 rarefied tables. Significant statistical differences were found between wild *O. c. cuniculus* and each of the other category by a pairwise Kruskal-Wallis test with a signification level of 99% ( $P < 0.01$ ).

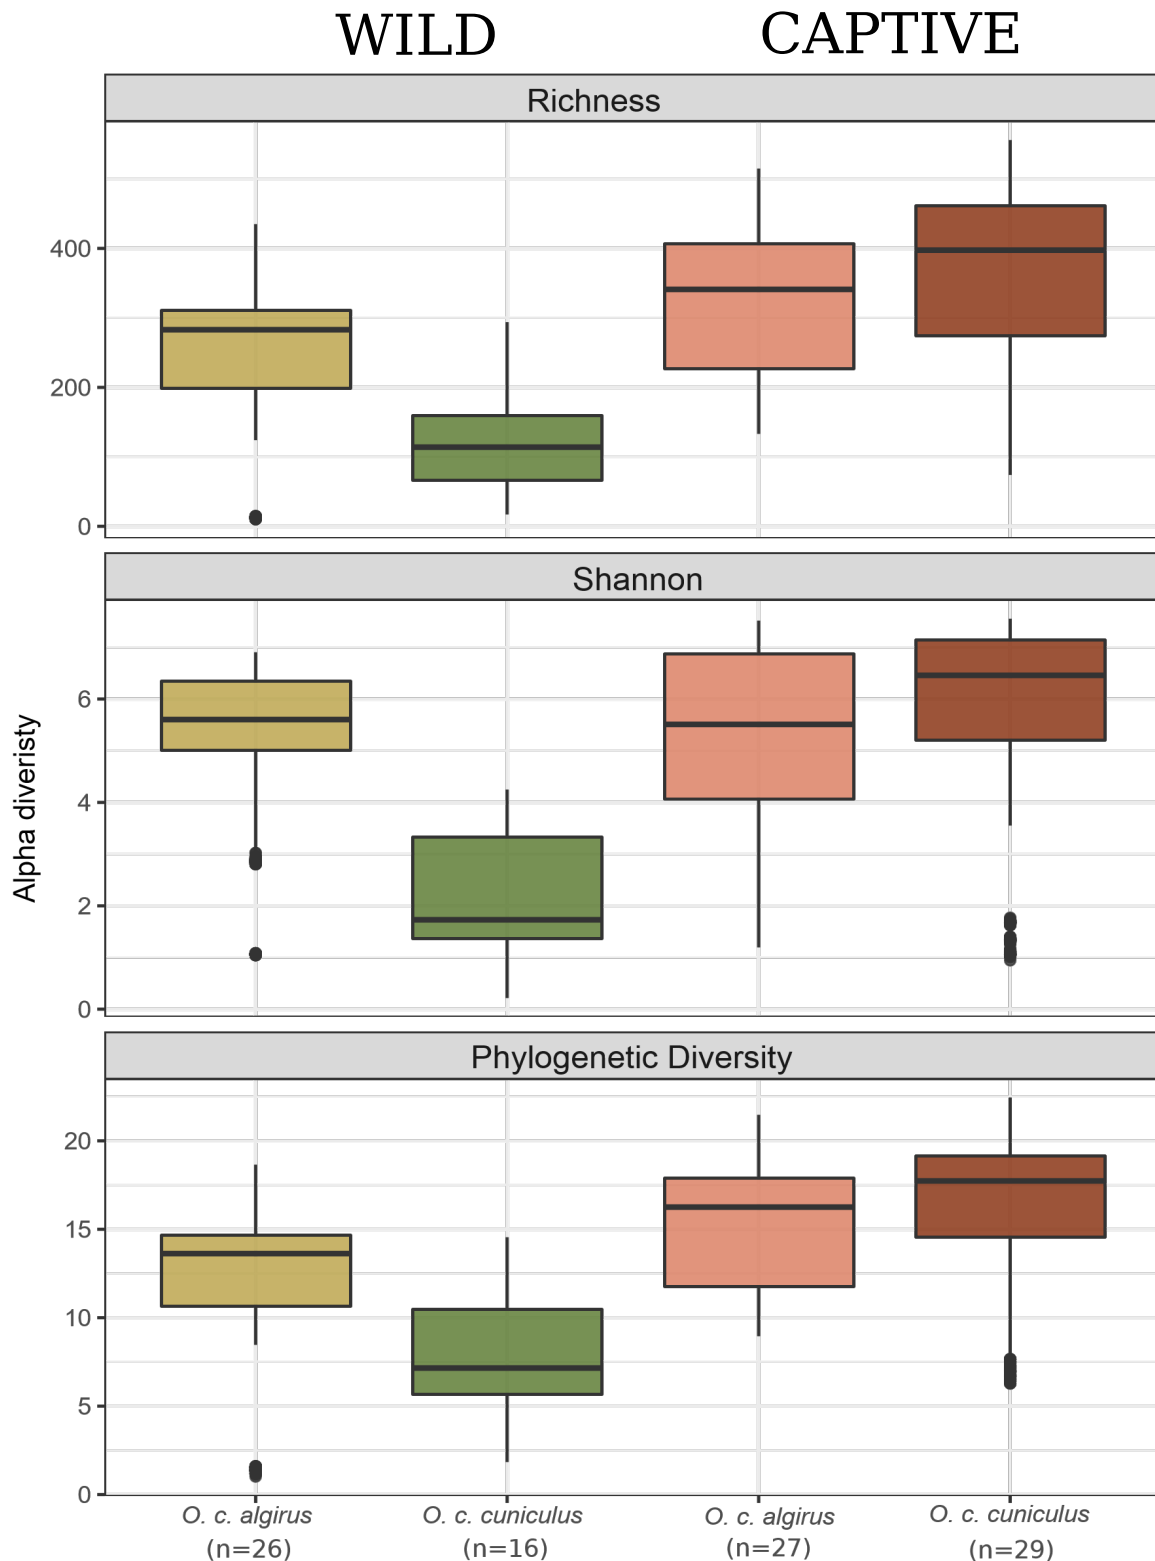

Supplement: 41598_2020_80782_MOESM1_ESM.pdf [file 41598_2020_80782_MOESM1_ESM.pdf]
